# Supplementary material for: A Systematic Review on the Link between Animal Welfare and Antimicrobial Use in Captive Animals
Source: Animals (Basel). 2022 Apr 14;12(8):1025. doi: 10.3390/ani12081025 (PMC9032364; doi:10.3390/ani12081025)
Supplement: Supplementary file 1 [file animals-12-01025-s001.zip › Table S2 Detailed search strings used in each database for each animal group.xlsx]

## Sheet: search_db
	Table S2: Detailed search strings used in each database for each animal group
	Date of search	Database	Animal Group	Search key (string)	Number of records retrieved
	2021-04-09	PubMed	Farm animals	("antimicrobial use"[tiab] OR "antimicrobial usage*"[tiab] OR "antibiotic use"[tiab] OR treatment*[tiab] OR medication*[tiab] OR drug*[tiab] OR "anti-bacterial agent*"[tiab] OR antimicrob*[tiab] OR antibiotic*[tiab] OR AMU[tiab] OR "antibacterial"[tiab]) AND (welfare[tiab] OR wellbeing[tiab] OR well-being[tiab] OR "animal care"[tiab]) AND (pig[tiab] OR pigs[tiab] OR swine[tiab] OR sow[tiab] OR so…	2326
	2021-04-09	PubMed	Zoo animals	("antimicrobial use"[tiab] OR "antimicrobial usage*"[tiab] OR "antibiotic use"[tiab] OR treatment*[tiab] OR medication*[tiab] OR drug*[tiab] OR "anti-bacterial agent*"[tiab] OR antimicrob*[tiab] OR antibiotic*[tiab] OR AMU[tiab] OR "antibacterial"[tiab]) AND (welfare[tiab] OR wellbeing[tiab] OR well-being[tiab] OR "animal care"[tiab]) AND (zoo[tiab] OR zoos[tiab] OR aquarium[tiab] OR "captive ani…	98
	2021-04-09	PubMed	Companion animals	("antimicrobial use"[tiab] OR "antimicrobial usage*"[tiab] OR "antibiotic use"[tiab] OR treatment*[tiab] OR medication*[tiab] OR drug*[tiab] OR "anti-bacterial agent*"[tiab] OR antimicrob*[tiab] OR antibiotic*[tiab] OR AMU[tiab] OR "antibacterial"[tiab]) AND (welfare[tiab] OR wellbeing[tiab] OR well-being[tiab] OR "animal care"[tiab]) AND (dog[tiab] OR dogs[tiab] OR pupp*[tiab] OR canine[tiab] OR…	617
	2021-04-09	PubMed	Lab animals	("antimicrobial use"[tiab] OR "antimicrobial usage*"[tiab] OR "antibiotic use"[tiab] OR treatment*[tiab] OR medication*[tiab] OR drug*[tiab] OR "anti-bacterial agent*"[tiab] OR antimicrob*[tiab] OR antibiotic*[tiab] OR AMU[tiab] OR "antibacterial"[tiab]) AND (welfare[tiab] OR wellbeing[tiab] OR well-being[tiab] OR "animal care"[tiab]) AND ("lab animal*"[tiab] OR rat[tiab] OR rats[tiab] OR mouse[t…	599
	2021-04-09	Web of Science	Companion animals	(TI=("antimicrobial us*" OR "antibiotic us*" OR treatment* OR medication* OR drug* OR "anti-bacterial agent*" OR antimicrob* OR antibiotic* OR AMU*) OR AB=("antimicrobial us*" OR "antibiotic us*" OR treatment* OR medication* OR drug* OR "anti-bacterial agent*" OR antimicrob* OR antibiotic* OR AMU*)) AND (TI=(welfare OR wellbeing OR well-being OR "animal care") OR AB=(welfare OR wellbeing OR well-…	773
	2021-04-09	Web of Science	Zoo animals	(TI=("antimicrobial us*" OR "antibiotic us*" OR treatment* OR medication* OR drug* OR "anti-bacterial agent*" OR antimicrob* OR antibiotic* OR AMU*) OR AB=("antimicrobial us*" OR "antibiotic us*" OR treatment* OR medication* OR drug* OR "anti-bacterial agent*" OR antimicrob* OR antibiotic* OR AMU*)) AND (TI=(welfare OR wellbeing OR well-being OR "animal care") OR AB=(welfare OR wellbeing OR well-…	863
	2021-04-09	Web of Science	Farm animals	(TI=("antimicrobial us*" OR "antibiotic us*" OR treatment* OR medication* OR drug* OR "anti-bacterial agent*" OR antimicrob* OR antibiotic* OR AMU*) OR AB=("antimicrobial us*" OR "antibiotic us*" OR treatment* OR medication* OR drug* OR "anti-bacterial agent*" OR antimicrob* OR antibiotic* OR AMU*)) AND (TI=(welfare OR wellbeing OR well-being OR "animal care") OR AB=(welfare OR wellbeing OR well-…	3177
	2021-04-09	Web of Science	Lab animals	(TI=("antimicrobial us*" OR "antibiotic us*" OR treatment* OR medication* OR drug* OR "anti-bacterial agent*" OR antimicrob* OR antibiotic* OR AMU*) OR AB=("antimicrobial us*" OR "antibiotic us*" OR treatment* OR medication* OR drug* OR "anti-bacterial agent*" OR antimicrob* OR antibiotic* OR AMU*)) AND (TI=(welfare OR wellbeing OR well-being OR "animal care") OR AB=(welfare OR wellbeing OR well-…	995
				Total	9448
