# Supplementary material for: A Systematic Review on the Link between Animal Welfare and Antimicrobial Use in Captive Animals
Source: Animals (Basel). 2022 Apr 14;12(8):1025. doi: 10.3390/ani12081025 (PMC9032364; doi:10.3390/ani12081025)
Supplement: Supplementary file 1 [file animals-12-01025-s001.zip › Table S3 List of papers rejected in the full text evaluation and reasons for its exclusion.xlsx]

## Sheet: Excluded papers Table
	Table S3. List of papers rejected in the full text evaluation and reasons for its exclusion (n = 9)
	Authors	Year	Title	Journal	DOI	Description AD	Reason for exclusion	Comments
	W. J. Smith	1993	Antibiotics in feed, with special reference to pigs: a veterinary viewpoint	Anim Feed Sci Technol	10.1016/0377-8401(93)90071-q		Does not explore the link between AMU and welfare	This paper mostly talks about the need to use AM, and it does not focus on its relationship with or impact on welfare. The paper states that using AM is imperative to safeguard welfare if animals are sick. This statement is not explored or explained.
	P. E. McNamara and G. Y. Miller	2002	Pigs, peoples and pathogens: A social welfare framework for the analysis of animal antibiotic use policy	American Journal of Agricultural Economics	10.1111/1467-8276.00392		Does not explore the link between AMU and welfare	This paper does not focus on the link between welfare and AMU. It speculates whether increasing social awareness for welfare will reduce or influence AMU.
	A. M. Grøndahl, E. M. Skancke, C. M. Mejdell, J. H. Jansen, A. M. Grondahl, E. M. Skancke, C. M. Mejdell and J. H. Jansen	2007	Growth rate, health and welfare in a dairy herd with natural suckling until 6-8 weeks of age: a case report	Acta Vet Scand	10.1186/1751-0147-49-16		Does not explore the link between AMU and welfare	This paper does not explore or focus on the possible reduction of AMU in calves allowed to suckle from their mothers (improved welfare).
	L. E. Green, J. N. Huxley, C. Banks and M. J. Green	2014	Temporal associations between low body condition, lameness and milk yield in a UK dairy herd	Prev Vet Med	10.1016/j.prevetmed.2013.10.009		Does not explore the link between AMU and welfare	This paper focuses on the effect of Body Condition Score (BCS) on lameness and milk yield. Lameness treatments are taken into account but no AMU specific data or comparisons are made.
	B. L. Gleeson and A. M. Collins	2015	Under what conditions is it possible to produce pigs without using antimicrobials?	Animal Production Science	10.1071/AN15271	To check	Does not explore the link between AMU and welfare	This paper focuses on all health related subjects but not on welfare.
	J. Y. Li	2017	Current status and prospects for in-feed antibiotics in the different stages of pork production - A review	Asian-Australas J Anim Sci	10.5713/ajas.17.0418	To check	Does not explore the link between AMU and welfare	This paper is not focused on reducing in-feed AMU through improving pig welfare.
	B. Odermatt, N. Keil and M. Lips	2019	Animal Welfare Payments and Veterinary and Insemination Costs for Dairy Cows	Agriculture-Basel	10.3390/agriculture9010003	Discussion	Does not explore the link between AMU and welfare	This paper explored the benefits of higher welfare systems in cattle and related them to veterinary and insemination costs. It did not focus or studied AMU.
	D. G. Belay, T. G. Abate and J. D. Jensen	2020	A Montero Auction Mechanism to Regulate Antimicrobial Consumption in Agriculture	American Journal of Agricultural Economics	10.1002/ajae.12079	To check	Does not explore the link between AMU and welfare	This paper uses a Montero Auction Mechanism to infer about the impact of a regulatory framework to promote and incentivize higher welfare standards in the Danish livestock sector on the overall use of AM in this sector.
	R. Albernaz-Gonçalves, G. Olmos and M. J. Hötzel	2021	My pigs are ok, why change? - animal welfare accounts of pig farmers	Animal	10.1016/j.animal.2020.100154		Does not explore the link between AMU and welfare	This paper explores the knowledge and attitudes of pig farmers towards pig welfare and the impact of such attitudes on farmers' selection of management strategies on the farm, rather than on AMU.
	Legend:
	AMU - Antimicrobial use
	AM - Antimicrobials
